# Supplementary material for: A new route to the synthesis of near-infrared absorbing pyrazinopyrazine bridged dyes with intramolecular charge transfer character
Source: Royal Society of Chemistry journal article supplement (doi:10.1039/c4cc01084a), 2014-01-01
Supplement: c4cc01084a1.pdf [file c4cc01084a1.pdf]

Electronic Supplementary Information

**A new route to the synthesis of near-infrared absorbing pyrazinopyrazine  
bridged dyes with intramolecular charge transfer character**

*Liang Zhang, Kin Cheung Lo, Wai Kin Chan\**

*Department of Chemistry, The University of Hong Kong*

*Pokfulam Road, Hong Kong, China*

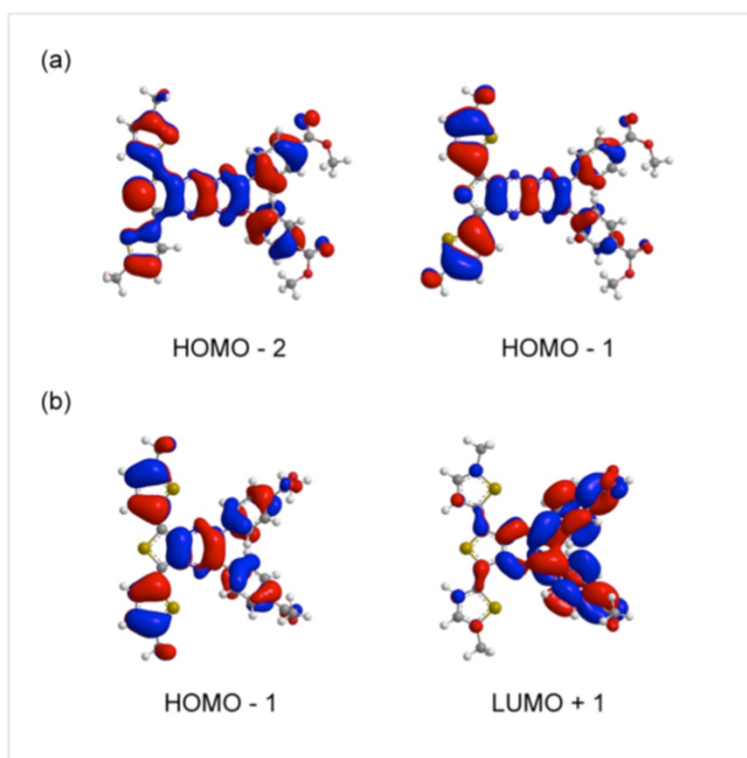

**Figure S1.** Spatial plots (isovalue = 0.02) of the molecular orbitals of (a) **5** and (b) **6** in toluene from TDDFT calculations.

**Table S1.** Shift in absorption energy (in eV) for compounds **5** and **6** in DMF and toluene. The first number corresponds to the shift of the higher energy absorption band and the second number corresponds to the shift of the lower energy band.

| Compound | Experimental Results obtained from UV-vis absorption spectra (eV) | TDDFT results (eV) |
|----------|-------------------------------------------------------------------|--------------------|
| <b>5</b> | 0.063, 0.086                                                      | -0.009, 0.019      |
| <b>6</b> | 0.020, 0.021                                                      | 0.019, 0.020       |

**Table S2.** Selected electronic excitations of **6** in toluene (Key: H – HOMO; L – LUMO).

| No. | Vertical excitation wavelength $\lambda$ (nm) | $f$   | Excitation                                                              | Configuration interaction (CI) coefficient |
|-----|-----------------------------------------------|-------|-------------------------------------------------------------------------|--------------------------------------------|
| 1   | 584                                           | 0.363 | H $\rightarrow$ L                                                       | 0.70                                       |
| 2   | 345                                           | 0.649 | H – 1 $\rightarrow$ L<br>H $\rightarrow$ L + 1<br>H $\rightarrow$ L + 5 | 0.33<br>0.57<br>-0.17                      |

**Table S3.** Selected electronic excitations of **6** in DMF.

| No. | $\lambda$ (nm) | $f$   | Excitation                                                              | CI coefficient        |
|-----|----------------|-------|-------------------------------------------------------------------------|-----------------------|
| 1   | 578            | 0.358 | H $\rightarrow$ L                                                       | 0.70                  |
| 2   | 343            | 0.690 | H – 1 $\rightarrow$ L<br>H $\rightarrow$ L + 1<br>H $\rightarrow$ L + 5 | 0.36<br>0.56<br>-0.17 |

**Table S4.** Selected electronic excitations of **5** in toluene.

| No. | $\lambda$ (nm) | $f$   | Excitation                                     | CI coefficient |
|-----|----------------|-------|------------------------------------------------|----------------|
| 1   | 870            | 0.183 | H $\rightarrow$ L                              | 0.70           |
| 2   | 397            | 0.980 | H – 2 $\rightarrow$ L<br>H – 1 $\rightarrow$ L | 0.30<br>0.60   |

**Table S5.** Selected electronic excitations of **5** in DMF.

| No. | $\lambda$ (nm) | $f$   | Excitation            | CI coefficient |
|-----|----------------|-------|-----------------------|----------------|
| 1   | 859            | 0.179 | H $\rightarrow$ L     | 0.70           |
| 3   | 398            | 0.991 | H - 9 $\rightarrow$ L | 0.12           |
|     |                |       | H - 2 $\rightarrow$ L | 0.27           |
|     |                |       | H - 1 $\rightarrow$ L | 0.62           |

**Table S6.** Cartesian coordinates of the optimized geometry of **6**.

| Atom  | X (Å)   | Y (Å)   | Z (Å)   |
|-------|---------|---------|---------|
| C(1)  | -2.3399 | 0.7181  | -0.0328 |
| C(2)  | -2.3399 | -0.7181 | 0.0328  |
| N(3)  | -1.1755 | 1.4103  | -0.0120 |
| N(4)  | -1.1755 | -1.4103 | 0.0120  |
| C(5)  | -0.0504 | 0.7322  | 0.0279  |
| C(6)  | -0.0504 | -0.7322 | -0.0279 |
| C(7)  | 1.1836  | -1.5495 | -0.1824 |
| C(8)  | 1.1836  | 1.5495  | 0.1824  |
| C(9)  | 1.2983  | -2.7577 | 0.5176  |
| C(10) | 2.4188  | -3.5635 | 0.3631  |
| C(11) | 3.4372  | -3.1986 | -0.5243 |
| C(12) | 3.3000  | -2.0199 | -1.2646 |
| C(13) | 2.2004  | -1.1939 | -1.0800 |
| C(14) | 1.2983  | 2.7577  | -0.5176 |
| C(15) | 2.4188  | 3.5636  | -0.3631 |
| C(16) | 3.4372  | 3.1986  | 0.5243  |
| C(17) | 3.3000  | 2.0199  | 1.2646  |
| C(18) | 2.2004  | 1.1939  | 1.0800  |
| C(19) | 4.6094  | -4.0861 | -0.8230 |
| C(20) | 4.6094  | 4.0861  | 0.8230  |
| O(21) | 5.0371  | 4.2204  | 1.9387  |
| O(22) | 5.1748  | 4.7953  | -0.1907 |
| O(23) | 5.0371  | -4.2203 | -1.9387 |
| O(24) | 5.1748  | -4.7953 | 0.1906  |
| C(25) | 5.1615  | 4.3367  | -1.5511 |
| C(26) | 5.1615  | -4.3367 | 1.5511  |
| C(27) | -3.6149 | 1.2852  | -0.0631 |
| S(28) | -4.7968 | 0.0000  | 0.0000  |
| C(29) | -3.6149 | -1.2852 | 0.0631  |
| C(30) | -4.0135 | 2.6641  | -0.1158 |

|       |         |         |         |
|-------|---------|---------|---------|
| C(31) | -4.0135 | -2.6640 | 0.1158  |
| C(32) | -5.2908 | 3.1748  | -0.2251 |
| C(33) | -5.3404 | 4.5900  | -0.2335 |
| C(34) | -4.1103 | 5.1828  | -0.1338 |
| C(35) | -5.2908 | -3.1747 | 0.2250  |
| C(36) | -5.3404 | -4.5900 | 0.2335  |
| C(37) | -4.1103 | -5.1828 | 0.1338  |
| S(38) | -2.8480 | 3.9819  | -0.0243 |
| C(39) | -3.7845 | 6.6445  | -0.1141 |
| S(40) | -2.8480 | -3.9819 | 0.0243  |
| C(41) | -3.7845 | -6.6445 | 0.1141  |
| H(42) | 0.4951  | -3.0593 | 1.1778  |
| H(43) | 2.4825  | -4.4957 | 0.9107  |
| H(44) | 4.0614  | -1.7685 | -1.9924 |
| H(45) | 2.1175  | -0.2826 | -1.6587 |
| H(46) | 0.4951  | 3.0593  | -1.1778 |
| H(47) | 2.4826  | 4.4957  | -0.9107 |
| H(48) | 4.0614  | 1.7685  | 1.9924  |
| H(49) | 2.1175  | 0.2825  | 1.6587  |
| H(50) | 6.1495  | 4.5597  | -1.9537 |
| H(51) | 4.9755  | 3.2640  | -1.6184 |
| H(52) | 4.4095  | 4.8756  | -2.1314 |
| H(53) | 6.1494  | -4.5597 | 1.9537  |
| H(54) | 4.9755  | -3.2641 | 1.6185  |
| H(55) | 4.4095  | -4.8757 | 2.1313  |
| H(56) | -6.1702 | 2.5480  | -0.3015 |
| H(57) | -6.2598 | 5.1562  | -0.3142 |
| H(58) | -6.1702 | -2.5480 | 0.3015  |
| H(59) | -6.2598 | -5.1562 | 0.3142  |
| H(60) | -4.7036 | 7.2291  | -0.1880 |
| H(61) | -3.2745 | 6.9355  | 0.8093  |
| H(62) | -3.1375 | 6.9290  | -0.9497 |
| H(63) | -4.7036 | -7.2291 | 0.1879  |
| H(64) | -3.2745 | -6.9355 | -0.8093 |
| H(65) | -3.1375 | -6.9290 | 0.9498  |

**Table S6.** Cartesian coordinates of the optimized geometry of **5**.

| Atom  | X (Å)   | Y (Å)   | Z (Å)   |
|-------|---------|---------|---------|
| C(1)  | -0.7581 | -0.7831 | -0.0639 |
| C(2)  | -0.7828 | 0.6593  | 0.0843  |
| N(3)  | 0.4330  | -1.4499 | -0.0440 |
| N(4)  | 0.3886  | 1.3624  | 0.0771  |
| C(5)  | 1.5409  | -0.7630 | 0.0433  |
| C(6)  | 1.5173  | 0.7081  | 0.0049  |
| C(7)  | 2.7361  | 1.5436  | -0.1671 |
| C(8)  | 2.7835  | -1.5586 | 0.2298  |
| C(9)  | 2.8309  | 2.7636  | 0.5148  |
| C(10) | 3.9279  | 3.5946  | 0.3297  |
| C(11) | 4.9535  | 3.2281  | -0.5486 |
| C(12) | 4.8616  | 2.0107  | -1.2308 |
| C(13) | 3.7630  | 1.1824  | -1.0510 |
| C(14) | 3.7885  | -1.1595 | 1.1204  |
| C(15) | 4.9144  | -1.9500 | 1.3155  |
| C(16) | 5.0602  | -3.1578 | 0.6267  |
| C(17) | 4.0371  | -3.5797 | -0.2303 |
| C(18) | 2.9155  | -2.7894 | -0.4298 |
| C(19) | 6.2164  | 4.0262  | -0.6974 |
| C(20) | 6.2090  | -4.0946 | 0.8691  |
| O(21) | 6.0500  | -5.2841 | 0.9412  |
| O(22) | 7.4517  | -3.5798 | 1.0558  |
| O(23) | 7.2954  | 3.4970  | -0.7468 |
| O(24) | 6.1410  | 5.3810  | -0.7319 |
| N(25) | -1.9135 | 1.3474  | 0.1759  |
| C(26) | -3.0455 | 0.6305  | 0.0966  |
| C(27) | -3.0186 | -0.8166 | -0.0975 |
| N(28) | -1.8687 | -1.5011 | -0.1673 |
| C(29) | -4.3503 | 1.1540  | 0.1680  |
| S(30) | -5.4875 | -0.1485 | -0.0119 |
| C(31) | -4.2942 | -1.3999 | -0.1801 |
| C(32) | -4.7645 | 2.5165  | 0.3473  |
| C(33) | -4.6590 | -2.7752 | -0.3588 |
| S(34) | -6.4652 | 2.9699  | 0.4285  |
| C(35) | -6.0725 | 4.6600  | 0.6382  |
| C(36) | -4.7150 | 4.8348  | 0.6426  |
| C(37) | -3.9714 | 3.6389  | 0.4803  |
| C(38) | -5.9294 | -3.3139 | -0.4334 |

|       |         |         |         |
|-------|---------|---------|---------|
| C(39) | -5.9419 | -4.7168 | -0.6137 |
| C(40) | -4.6906 | -5.2719 | -0.6797 |
| S(41) | -3.4550 | -4.0515 | -0.5166 |
| C(42) | -7.1498 | 5.6883  | 0.7846  |
| C(43) | -4.3258 | -6.7131 | -0.8606 |
| C(44) | 7.8629  | -2.3244 | 0.4899  |
| C(45) | 4.9717  | 6.0760  | -1.1952 |
| H(46) | 2.0322  | 3.0498  | 1.1871  |
| H(47) | 3.9958  | 4.5184  | 0.8910  |
| H(48) | 5.6639  | 1.7216  | -1.8982 |
| H(49) | 3.7016  | 0.2543  | -1.6049 |
| H(50) | 3.6868  | -0.2382 | 1.6797  |
| H(51) | 5.6660  | -1.6349 | 2.0285  |
| H(52) | 4.1309  | -4.5385 | -0.7249 |
| H(53) | 2.1185  | -3.1193 | -1.0838 |
| H(54) | -4.2572 | 5.8091  | 0.7609  |
| H(55) | -2.8936 | 3.5787  | 0.4574  |
| H(56) | -6.8285 | -2.7151 | -0.3601 |
| H(57) | -6.8491 | -5.3025 | -0.6924 |
| H(58) | -6.7007 | 6.6763  | 0.9026  |
| H(59) | -7.8057 | 5.7194  | -0.0910 |
| H(60) | -7.7788 | 5.4981  | 1.6598  |
| H(61) | -5.2312 | -7.3160 | -0.9540 |
| H(62) | -3.7227 | -6.8700 | -1.7602 |
| H(63) | -3.7521 | -7.0966 | -0.0112 |
| H(64) | 8.8809  | -2.4753 | 0.1316  |
| H(65) | 7.2254  | -2.0228 | -0.3418 |
| H(66) | 7.8647  | -1.5425 | 1.2519  |
| H(67) | 5.3374  | 6.9227  | -1.7754 |
| H(68) | 4.3454  | 5.4447  | -1.8266 |
| H(69) | 4.3860  | 6.4467  | -0.3515 |

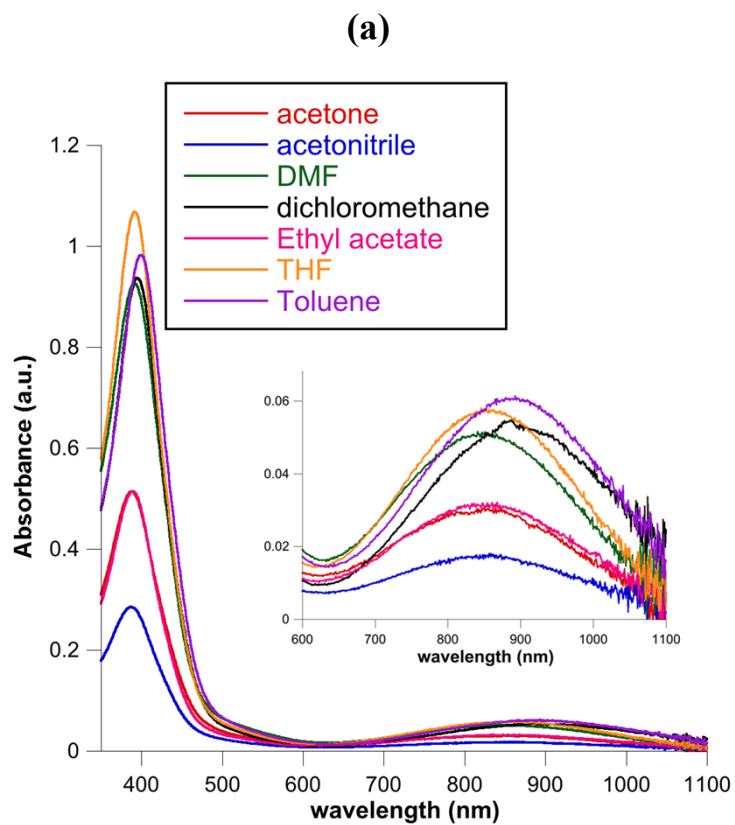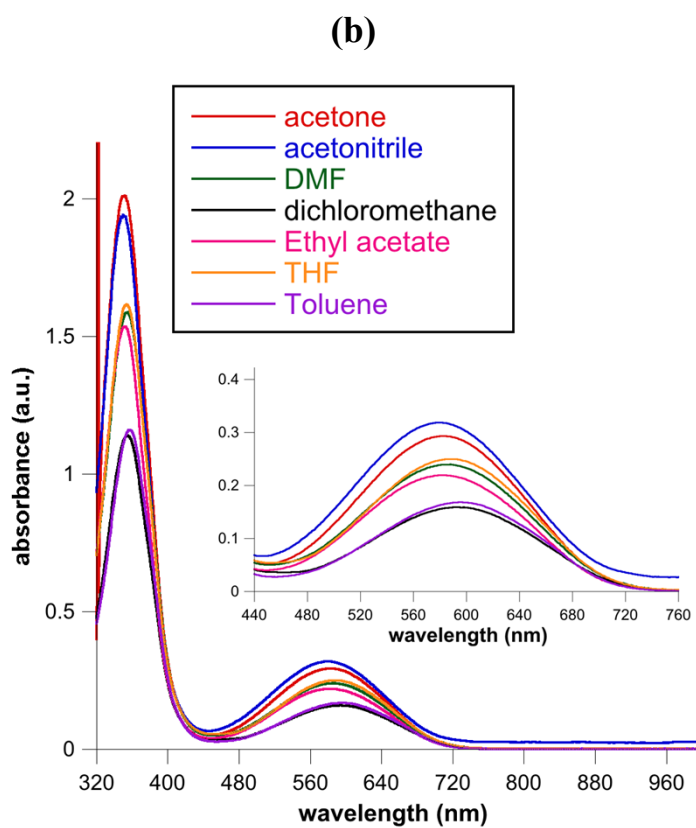

**Figure S2.** UV-vis absorption spectra of (a) compound **5**; and (b) compound **6** in solvents with different polarities.

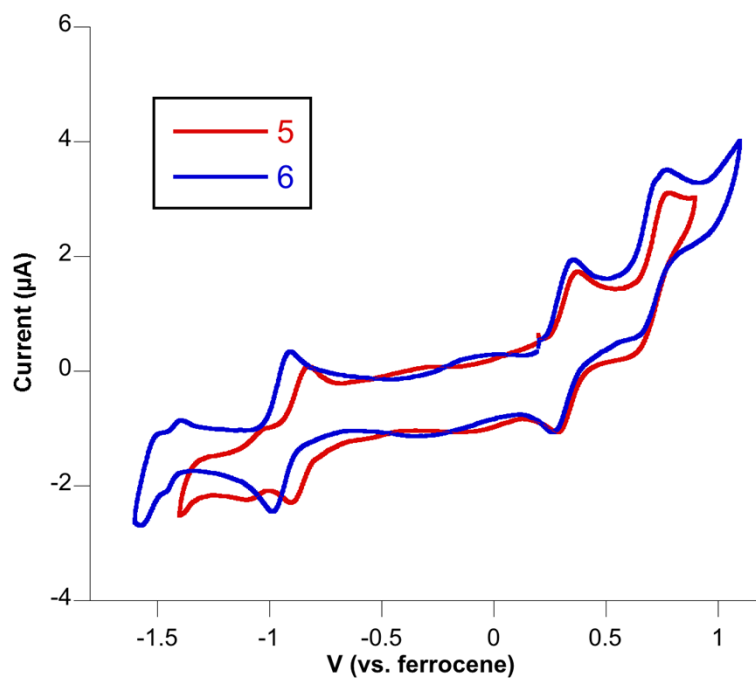

**Figure S3.** Cyclic voltammograms of compounds **5** and **6** measured in dichloromethane with tetrabutylammonium tetrafluoroborate as the electrolyte (conc. = 0.1 M). Scan rate = 20 mV/s.



## Experimental Section

**Materials.** All solvents and chemicals were used as received unless otherwise specified. 2-(Tributyl-stannyl)pyridine and tin(II) chloride were obtained from Alfa Aesar. Pd(PPh<sub>3</sub>)<sub>4</sub> was obtained from Apollo. PdBr<sub>2</sub> were obtained from Strem. *p*-Toluenesulfonic acid was obtained from Lancaster Synthesis. 2,2,2-Trifluoroethanol was obtained from Sigma Aldrich. Compounds **2a** and **2b** were synthesized by the reduction of the corresponding dinitro substituted terthiophene derivatives using tin(II) chloride as the reducing agent.

## Instruments

<sup>1</sup>H and <sup>13</sup>C NMR spectra were recorded on Bruker DPX 300 MHz, Bruker Avance 400 MHz, Bruker DRX 500 MHz and Bruker Avance 600 MHz spectrometers. <sup>1</sup>H and <sup>13</sup>C NMR signals are reported in ppm. <sup>1</sup>H signals are referenced to the residual proton of a deuterated solvent 7.26 ppm for CDCl<sub>3</sub>, 2.50 ppm for d<sub>6</sub>-DMSO and 4.79 ppm for D<sub>2</sub>O. <sup>13</sup>C NMR signals are referenced to the solvent signal CDCl<sub>3</sub> at 77.0 ppm, 39.5 ppm for d<sub>6</sub>-DMSO. Cyclic voltammety was performed by e-corder 401 potentiostat. UV-vis absorption spectra were recorded on VARIAN CARY 50 Bio. EIMS was recorded on DFS HRMS; ESI was recorded on LCQ Classic Finnigan.

## Synthesis

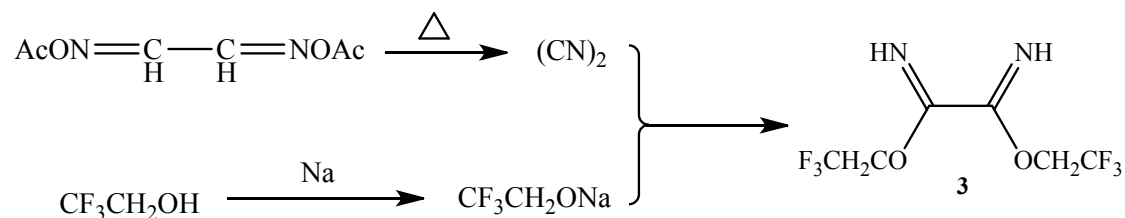

**Bis(2,2,2-trifluoroethyl) oximidate 3.** Diacetylglyoxim<sup>1</sup> (50 mmol, 8.6 g) was introduced into a three-necked 250 mL round bottom flask equipped with N<sub>2</sub> inlet and N<sub>2</sub> outlet. The N<sub>2</sub> outlet was connected to three traps before exiting to a bleach bubbler. The first trap was cooled by ice-water bath and the second and third ones were cooled to -78 °C. A slow

stream of N<sub>2</sub> was allowed to flow through the system. The flask was heated to 160 °C when an exothermic reaction occurred. The temperature was allowed to increase slowly. The first trap contained acetic acid while the other two traps contained cyanogen. In another 100 mL 2-necked round bottom flask, sodium (8.7 mmol, 200 mg) was added to trifluoroethanol (20 mL) at room temperature. The resulting sodium trifluoroethoxide solution was cooled to -50 °C. The trapped liquid cyanogen was allowed to warm up slowly and the cyanogen gas was carried with a N<sub>2</sub> stream to the sodium trifluoroethoxide solution. After addition, the reaction was stirred at room temperature for 1 h. Cold water was added and the mixture was extracted with dichloromethane three times. The combined organic layer was dried over MgSO<sub>4</sub> and the solvent was evaporated to yield the required title compound **3** (6.5g, 53%), which was used for subsequent reactions directly. <sup>1</sup>H NMR (d<sub>6</sub>-DMSO, 400 MHz): δ 9.80 (s, 2H), 4.88-4.78 (m, 4H); <sup>13</sup>C NMR (d<sub>6</sub>-DMSO, 100 MHz): δ 154.9, 127.8, 125.1, 122.3, 119.5, 62.2, 61.9, 61.5, 61.2; MS (ESI): m/z 253.1.

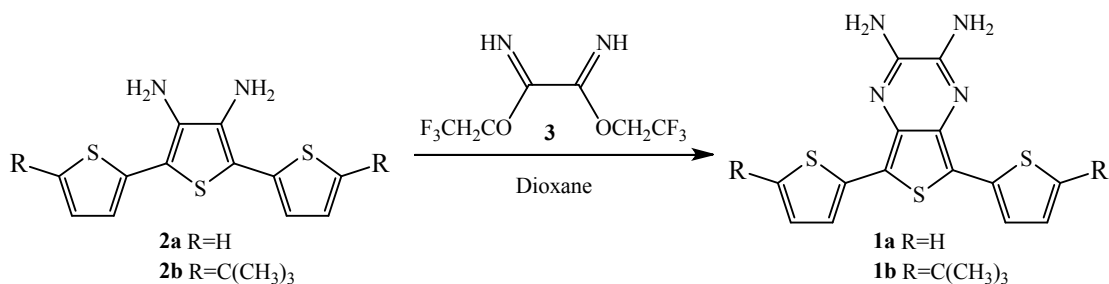

**General procedure for the synthesis of compound 1a-b.** To a solution of degassed dioxane (12 mL), compound **2** (1.41 mmol, 1equiv) and compound **3** (2.12 mmol, 1.5equiv) were added. The mixture was heated at reflux for 5 h. The solvent was evaporated and the residue was subjected directly to silica column chromatography using ethyl acetate/hexane (1:9-3:7) as eluent. The product was purified by recrystallization in hexane.

**1a:** Yield: 65%.  $^1\text{H}$  NMR ( $\text{d}_6\text{-DMSO}$ , 300 MHz):  $\delta$  7.47 (d, 2H,  $J=3.7$  Hz), 7.44 (d, 2H,  $J=5.1$  Hz), 7.07 (dd, 2H,  $J=3.7$  Hz,  $J=5.1$  Hz), 6.78 (s, 4H);  $^{13}\text{C}$  NMR ( $\text{d}_6\text{-DMSO}$ , 100 MHz):  $\delta$  145.5, 135.8, 135.6, 127.1, 124.4, 122.4, 114.3; MS (EI):  $m/z$  329.9 ( $\text{M}^+$ , 100%).

**1b:** Yield: 84%.  $^1\text{H}$  NMR ( $\text{d}_6\text{-DMSO}$ , 400 MHz):  $\delta$  7.24 (d, 2H,  $J=3.7$  Hz), 6.90 (s, 4H), 6.80 (d, 2H,  $J=3.7$  Hz), 1.36 (s, 18H);  $^{13}\text{C}$  NMR ( $\text{d}_6\text{-DMSO}$ , 150 MHz):  $\delta$  155.2, 145.4, 135.4, 132.9, 122.0, 121.7, 114.4, 34.3, 32.3; MS (EI):  $m/z$  442.1 ( $\text{M}^+$ , 100%).

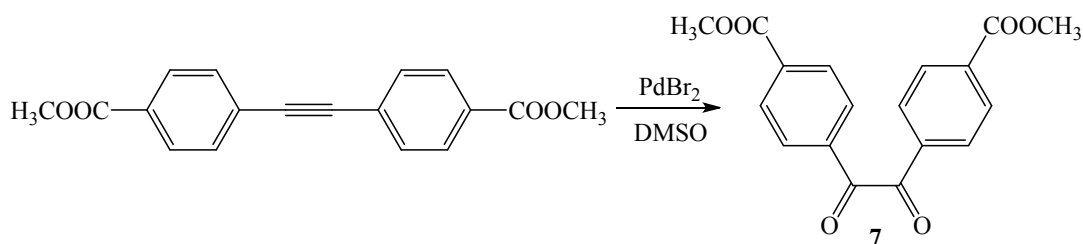

**Diketone 7.** A mixture of bis(4-(methoxycarbonyl)phenyl)acetylene<sup>2</sup> (0.5 mmol, 147 mg) and  $\text{PdBr}_2$ <sup>3</sup> (0.1 mmol, 13 mg) was added into  $\text{DMSO}$  (5 mL). The solution was stirred at 140 °C for 4 h. After cooling to room temperature, water was added and the precipitate was filtered and washed thoroughly by water. Yield: 121 mg (74%).  $^1\text{H}$  NMR ( $\text{CDCl}_3$ , 400 MHz):  $\delta$  8.18 (d, 4H,  $J=8.6$  Hz), 8.05 (d, 4H,  $J=8.6$  Hz), 3.97 (s, 6H);  $^{13}\text{C}$  NMR ( $\text{CDCl}_3$ , 125 MHz):  $\delta$  192.9, 165.8, 135.8, 135.6, 130.2, 129.9.

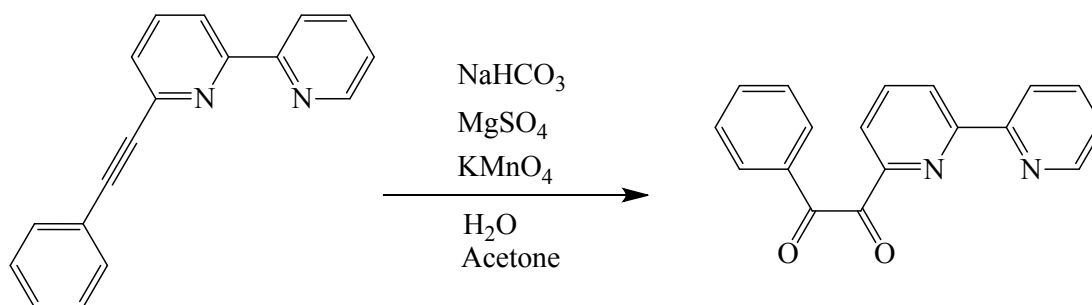

**Diketone 8.** NaHCO<sub>3</sub> (0.97 mmol, 82 mg) and MgSO<sub>4</sub> (6.81 mmol, 820 mg) in H<sub>2</sub>O (36 mL) was added to a solution of 6-(phenylethynyl)-2,2'-bipyridine<sup>4</sup> (6.24 mmol, 1.6 g) in acetone (80 mL). KMnO<sub>4</sub> (15.5 mmol, 2.45g) was added in a single portion to the solution with rigorous stirring. The mixture was stirred vigorously at room temperature for 1.5 hours and then quenched by the addition of aqueous NaHSO<sub>3</sub>. After 30 min, the suspension was filtered through celite, and the filtrate was extracted by ethyl acetate three times. The combined organic layer was washed with aqueous K<sub>2</sub>CO<sub>3</sub>, brine, and dried over MgSO<sub>4</sub>. The solvent was evaporated under *vacuo*, yielding the (2,2'-bipyridin)-6-yl-2-phenylethanedione as off-white solid (1.01 mg, 56%). <sup>1</sup>H NMR (CDCl<sub>3</sub>, 300 MHz): δ 8.67 (d, 1H, *J*=7.9 Hz), 8.60 (d, 1H, *J*=4.2 Hz), 8.20 (d, 1H, *J*=7.5 Hz), 8.04 (t, 1H, *J*=7.8 Hz), 7.99 (d, 3H, *J*=7.4 Hz), 7.63 (t, 2H, *J*=6.9 Hz), 7.51 (t, 2H, *J*=7.5 Hz), 7.23 (dd, 1H, *J*=4.9 Hz, *J*=6.5 Hz); <sup>13</sup>C NMR (CDCl<sub>3</sub>, 75 MHz): δ 196.6, 196.5, 156.0, 154.2, 150.8, 148.9, 138.2, 136.9, 134.3, 133.5, 129.2, 128.8, 125.3, 124.2, 122.6, 121.1; MS (EI): *m/z* 288.1 (M<sup>+</sup>, 100%).

**Condensation between diketones and diamines.** The synthesis of **5** is described here as the general procedure. To a degassed solution of ethanol (8 mL), diketones **7** (2.49 mmol, 1.1 equiv), diamines **1** (2.26 mmol, 1 equiv) and *p*-toluenesulfonic acid (0.226 mmol, 0.1 equiv) were added. The mixture was heated under reflux in a N<sub>2</sub> atmosphere overnight. After

cooling, the precipitate was filtered, wash with hot methanol and then with ether to yield the title compound. It was purified by recrystallization with methanol.

**4a.** Yield: 27%. <sup>1</sup>H NMR (d<sub>6</sub>-DMSO, 400 MHz): δ 8.62 (d, 1H, *J*=7.9 Hz), 8.43 (d, 1H, *J*=7.9 Hz), 8.37 (d, 1H, *J*=7.7 Hz), 8.24 (t, 1H, *J*=7.9 Hz), 7.96-7.92 (m, 2H), 7.85-7.79 (m, 2H), 7.72-7.62 (m, 3H), 7.48-7.41 (m, 3H), 7.39 (m, 1H), 7.31-7.24 (m, 2H), 7.20 (d, 8.1 Hz); <sup>13</sup>C NMR (d<sub>6</sub>-DMSO, 150 MHz): δ 160.8, 157.5, 154.4, 153.9, 149.2, 143.8, 143.4, 140.7, 140.6, 138.9, 138.8, 136.9, 133.5, 129.5, 129.2, 128.7, 128.6, 128.1, 128.06, 128.0, 125.8, 125.7, 125.2, 124.4, 123.8, 123.4, 121.3, 120.4; MS (EI): *m/z* 582.2 (M<sup>+</sup>, 100%).

**4b.** Yield: 75%. <sup>1</sup>H NMR (CDCl<sub>3</sub>, 300 MHz): δ 8.59 (m, 1H), 8.45 (d, 1H, *J*=5.2 Hz), 8.42 (d, 1H, *J*=4.1 Hz), 8.06 (t, 1H, *J*=7.8 Hz), 7.96-7.92 (m, 2H), 7.79-7.74 (m, 2H), 7.69-7.65 (m, 2H), 7.55 (m, 1H), 7.37 (m, 3H), 7.24-7.20 (m, 2H), 6.92-6.89 (m, 2H), 1.48 (s, 18H); <sup>13</sup>C NMR (CDCl<sub>3</sub>, 150 MHz): δ 160.8, 160.1, 160.0, 157.4, 155.3, 154.9, 154.5, 148.9, 143.8, 143.4, 141.4, 141.3, 139.3, 138.1, 136.7, 131.7, 131.6, 129.5, 129.4, 128.1, 125.9, 125.8, 125.0, 124.8, 124.5, 123.9, 122.6, 121.7, 121.3, 35.0, 32.4; MS (EI): *m/z* 694.2 (M<sup>+</sup>, 100%). HSMS: Calcd. For C<sub>40</sub>H<sub>34</sub>N<sub>6</sub>S<sub>3</sub>: 694.2007. Found: 694.1988.

**5.** Yield: 77 %. <sup>1</sup>H NMR (CDCl<sub>3</sub>, 400 MHz): δ 8.04 (d, 4H, *J*=8.4 Hz), 7.75 (d, 2H, *J*=3.8 Hz), 7.70 (d, 4H, *J*=8.4 Hz), 6.90 (d, 2H, *J*=3.8 Hz), 3.95 (s, 6H), 1.47 (s, 18H); <sup>13</sup>C NMR (CDCl<sub>3</sub>, 125 MHz): δ 166.4, 160.3, 158.5, 143.5, 141.6, 141.5, 131.6, 130.1, 129.6, 126.0, 124.8, 122.7, 52.4, 35.0, 32.4; MS (EI): *m/z* 732.2 (M<sup>+</sup>, 100%). HRMS: Calcd. For C<sub>40</sub>H<sub>36</sub>N<sub>4</sub>O<sub>4</sub>S<sub>3</sub>: 732.1899. Found: 732.1920.

**Compound 6.** It was prepared by the same procedure by the reaction between **2b** and **7**. Yield: 75%. <sup>1</sup>H NMR (CDCl<sub>3</sub>, 300 MHz): δ 7.98 (d, 4H, *J*=8.4 Hz), 7.60 (d, 4H, *J*=8.4 Hz), 7.51 (d, 2H, *J*=3.7 Hz), 6.83 (d, 2H, *J*=3.7 Hz), 3.91 (s, 6H), 1.42 (s, 18H); <sup>13</sup>C NMR (CDCl<sub>3</sub>, 125 MHz): δ 166.7, 159.4, 151.2, 143.2, 137.0, 131.5, 130.4, 129.9, 129.4, 125.7, 125.0, 122.2, 52.3, 34.8, 32.4; MS (EI): *m/z* 680.1 (M<sup>+</sup>, 100%). HRMS: Calcd. For C<sub>38</sub>H<sub>36</sub>N<sub>2</sub>O<sub>4</sub>S<sub>3</sub>: 680.1837. Found: 680.1821.

### DFT Calculations

The geometric optimization of all the molecules were performed using DFT calculations at the B3LYP/6-311G(d,p) level. The Cartesian coordinates are shown in Tables S1 and S2. Vibrational analysis verified that all the structures were at the minimum of the energy surface. The singlet-singlet transitions were calculated by TDDFT using CAM-B3LYP Coulomb-attenuated functional<sup>5</sup> with the polarizable continuum model<sup>6</sup> using toluene ( $\epsilon = 2.3741$ ) and DMF ( $\epsilon = 37.219$ ). All calculations were performed in Gaussian 09<sup>7</sup> installed in the GRIDPOINT system of the University of Hong Kong. The spatial plots of molecular orbitals were generated by ChemBio3D Ultra 12.0.

### References

- 1 D. J. Park, A. G. Stern, R. L. Wilier, *Synth. commun.* 1990, **20**, 2901.
- 2 H. Christensen, C. Schjøth-Eskesen, M. Jensen, S. Sinning, H. H. Jensen, *Chem. Eur. J.* 2011, **17**, 10618.
- 3 C. Mousset, O. Provot, A. Hamze, J. Bignon, J.-D. Brion, M. Alami, *Tetrahedron* 2008, **64**, 4287.

- 4 D. Alagille, R. M. Baldwin, B. L. Roth, T. Wroblewski, E. Grajkowskac and G. D. Tamagnana, *Bioorg. Med. Chem.*, 2005, **13**, 197.
5. Yanai, T.; Tew, D. P.; Handy, N. C., *Chem. Phys. Lett.*, 2004, **393**, 51.
6. Scalmani, G.; Frisch, M. J., *J. Chem. Phys.* 2010, **132**, 114110.
7. Gaussian 09, Revision C.01, Frisch, M. J.; Trucks, G. W.; Schlegel, H. B.; Scuseria, G. E.; Robb, M. A.; Cheeseman, J. R.; Scalmani, G.; Barone, V.; Mennucci, B.; Petersson, G. A.; Nakatsuji, H.; Caricato, M.; Li, X.; Hratchian, H. P.; Izmaylov, A. F.; Bloino, J.; Zheng, G.; Sonnenberg, J. L.; Hada, M.; Ehara, M.; Toyota, K.; Fukuda, R.; Hasegawa, J.; Ishida, M.; Nakajima, T.; Honda, Y.; Kitao, O.; Nakai, H.; Vreven, T.; Montgomery, J. A., Jr.; Peralta, J. E.; Ogliaro, F.; Bearpark, M.; Heyd, J. J.; Brothers, E.; Kudin, K. N.; Staroverov, V. N.; Kobayashi, R.; Normand, J.; Raghavachari, K.; Rendell, A.; Burant, J. C.; Iyengar, S. S.; Tomasi, J.; Cossi, M.; Rega, N.; Millam, N. J.; Klene, M.; Knox, J. E.; Cross, J. B.; Bakken, V.; Adamo, C.; Jaramillo, J.; Gomperts, R.; Stratmann, R. E.; Yazyev, O.; Austin, A. J.; Cammi, R.; Pomelli, C.; Ochterski, J. W.; Martin, R. L.; Morokuma, K.; Zakrzewski, V. G.; Voth, G. A.; Salvador, P.; Dannenberg, J. J.; Dapprich, S.; Daniels, A. D.; Farkas, Ö.; Foresman, J. B.; Ortiz, J. V.; Cioslowski, J.; Fox, D. J. Gaussian, Inc., Wallingford CT, 2009.
